# Supplementary material for: Neuroprotective effects of a new triterpenoid from edible mushroom on oxidative stress and apoptosis through the BDNF/TrkB/ERK/CREB and Nrf2 signaling pathway in vitro and in vivo
Source: Royal Society of Chemistry journal article supplement (doi:10.1039/d2fo02854a), 2022-01-01

**Original Images for Blots of Figure 4C**

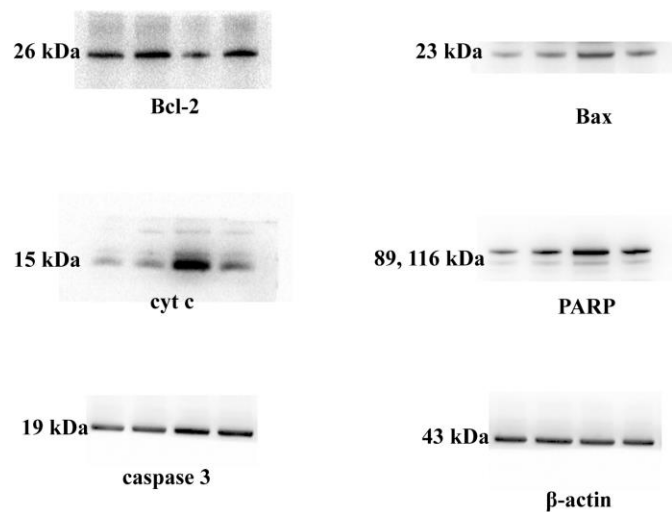

**Original Images for Blots of Figure 5A**

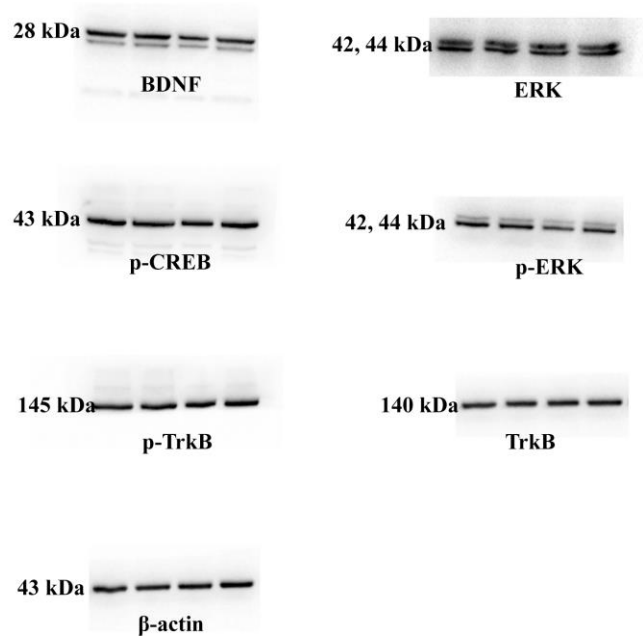

**Original Images for Blots of Figure 6A**

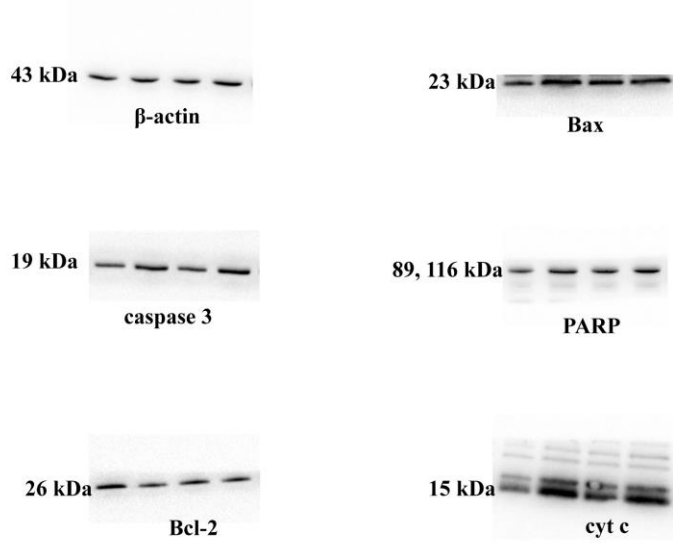

**Original Images for Blots of Figure 6C**

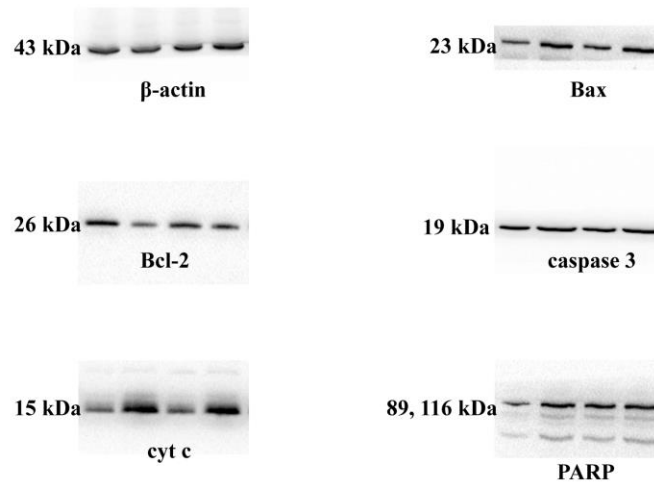

**Original Images for Blots of Figure 6E**

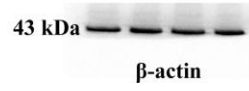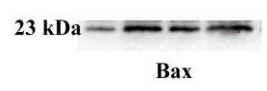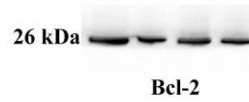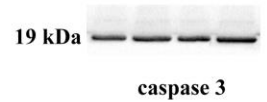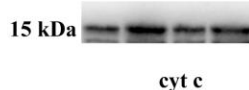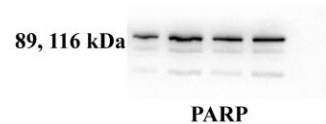

**Original Images for Blots of Figure 7B**

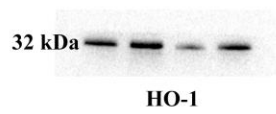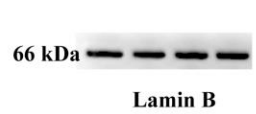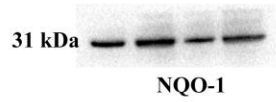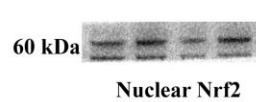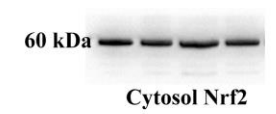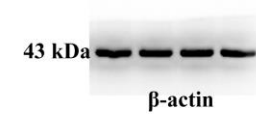

Original Images for Blots of Figure 9A

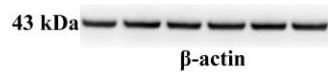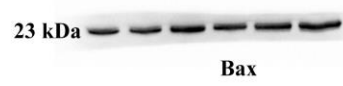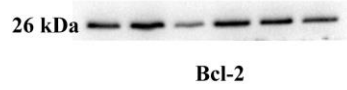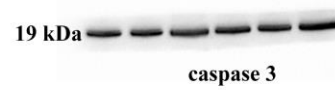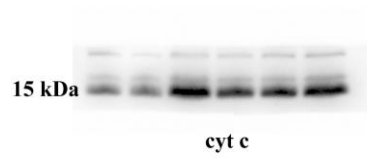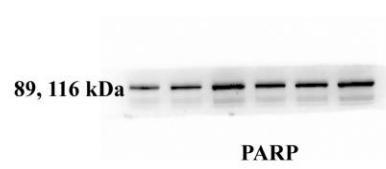

Supplement: d2fo02854a1.pdf [file d2fo02854a1.pdf]
