# Supplementary material for: Neuroprotective effects of a new triterpenoid from edible mushroom on oxidative stress and apoptosis through the BDNF/TrkB/ERK/CREB and Nrf2 signaling pathway in vitro and in vivo
Source: Royal Society of Chemistry journal article supplement (doi:10.1039/d2fo02854a), 2022-01-01

## Supporting Information

# Neuroprotective Effects of a New Triterpenoid from Edible Mushroom on Oxidative Stress and Apoptosis through the BDNF/TrkB/ERK/CREB and Nrf2 Signaling Pathway in Vitro and in Vivo

Rong-Wei Kou †, #, Bing Xia †, #, Rui Han †, Zhi-Qing Li †, Jun-Ren Yang †, Xia Yin, †, \*, Yu-Qi Gao, &, \* and Jin-Ming Gao †, \*

† Shaanxi Key Laboratory of Natural Products & Chemical Biology, College of Chemistry & Pharmacy, Northwest A&F University, Yangling 712100, Shaanxi, People's Republic of China

& College of Food Science and Technology, Northwest University, Xi'an, 710069, Shaanxi, People's Republic of China

# These authors contributed equally to this work.

\* Corresponding author (Tel: +86-29-87092335; Fax: +86-29-87092226; E-mail:

[jinminggao@nwsuaf.edu.cn](mailto:jinminggao@nwsuaf.edu.cn)

**Figure S1.** The structures of metabolites from *I. obliquus*.

**Figure S2.** Neuroprotection of compounds **1-10** in H<sub>2</sub>O<sub>2</sub>-induced SH-SY5Y cells at 20 μM.

**Figure S3.** H<sub>2</sub>O<sub>2</sub> inhibited the BDNF/TrkB/ERK/CREB pathway in SH-SY5Y cells.

(A) Western blot analysis at various time. (B-E) Density analysis.

**Figure S4.** The effects of TrkB (ANA-12), ERK (SCH772984), and CREB (666-15)

inhibitors. (A-C) Western blot analysis for p-ERK/ERK, p-CREB/CREB, BDNF and p-TrkB/TrkB, respectively. (D-G) Density analysis.

**Figure S5.** Nrf2 was involved in the antioxidant effect of 2α-HI (10 μM) in SH-SY5Y

cells stimulated by H<sub>2</sub>O<sub>2</sub>. (A and B) Nrf2 siRNA or NC siRNA transfected cells. (C)

Western blot analysis for Nrf2 in nuclear, HO-1 and NQO-1 in Nrf2 siRNA or NC siRNA transfected cells. (D-F) Density analysis.

**Figure S6-S11.** NMR spectra of 2α-hydroxy-inotodiol

**Figure S12.** HRESIMS spectrum of 2α-hydroxy-inotodiol

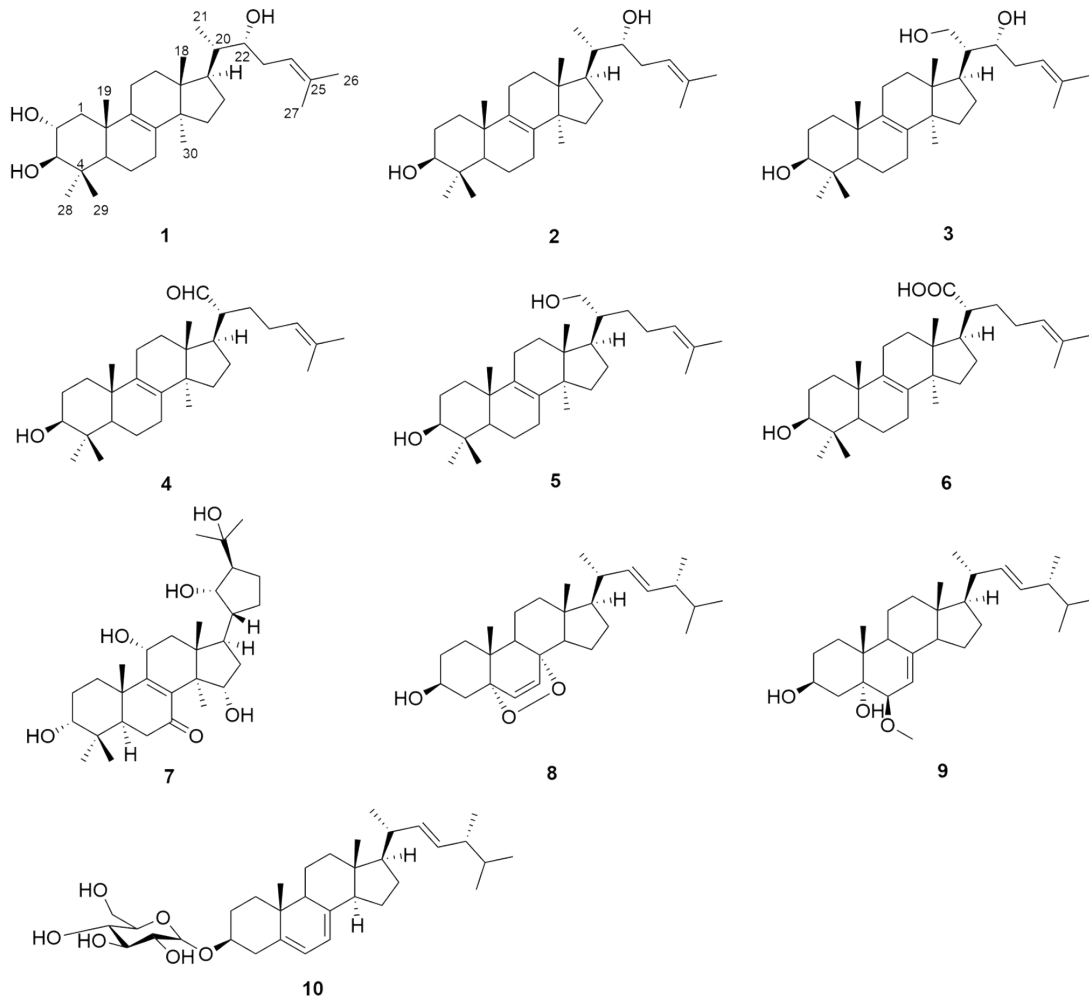

**Figure S1.** The structures of metabolites from *I. obliquus*.

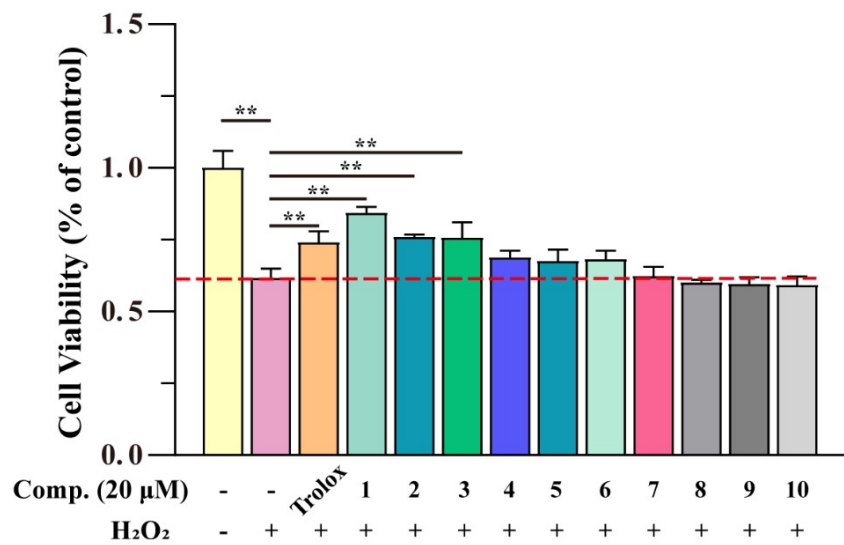

**Figure S2.** Neuroprotection of compounds 1-10 in H<sub>2</sub>O<sub>2</sub>-induced SH-SY5Y cells at 20 μM.

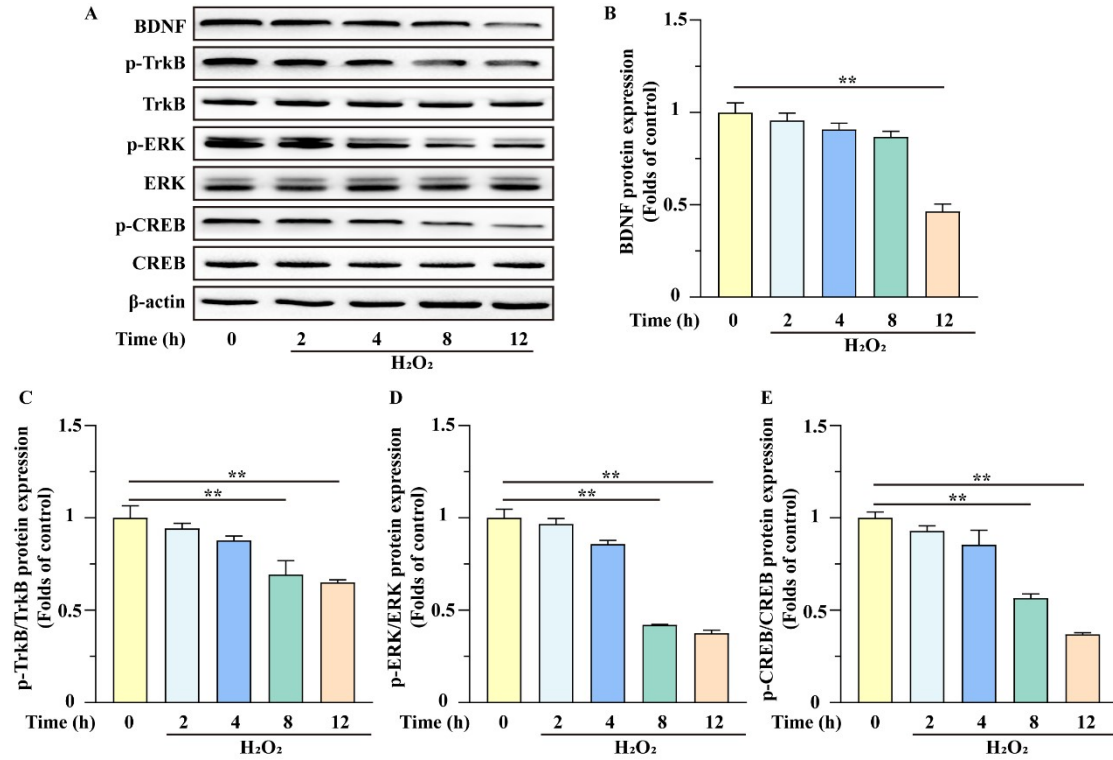

**Figure S3.** H<sub>2</sub>O<sub>2</sub> inhibited the BDNF/TrkB/ERK/CREB pathway in SH-SY5Y cells. (A) Western blot analysis at various time. (B-E) Density analysis.

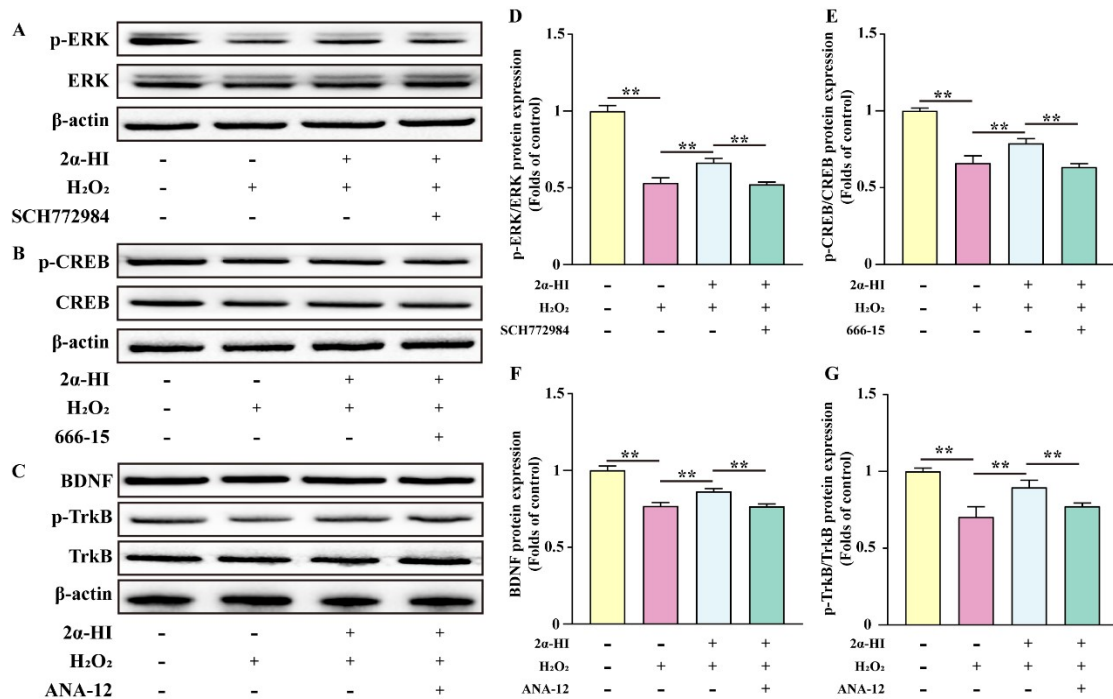

**Figure S4.** The effects of TrkB (ANA-12), ERK (SCH772984), and CREB (666-15) inhibitors. (A-C) Western blot analysis for p-ERK/ERK, p-CREB/CREB, BDNF and p-TrkB/TrkB, respectively. (D-G) Density analysis.

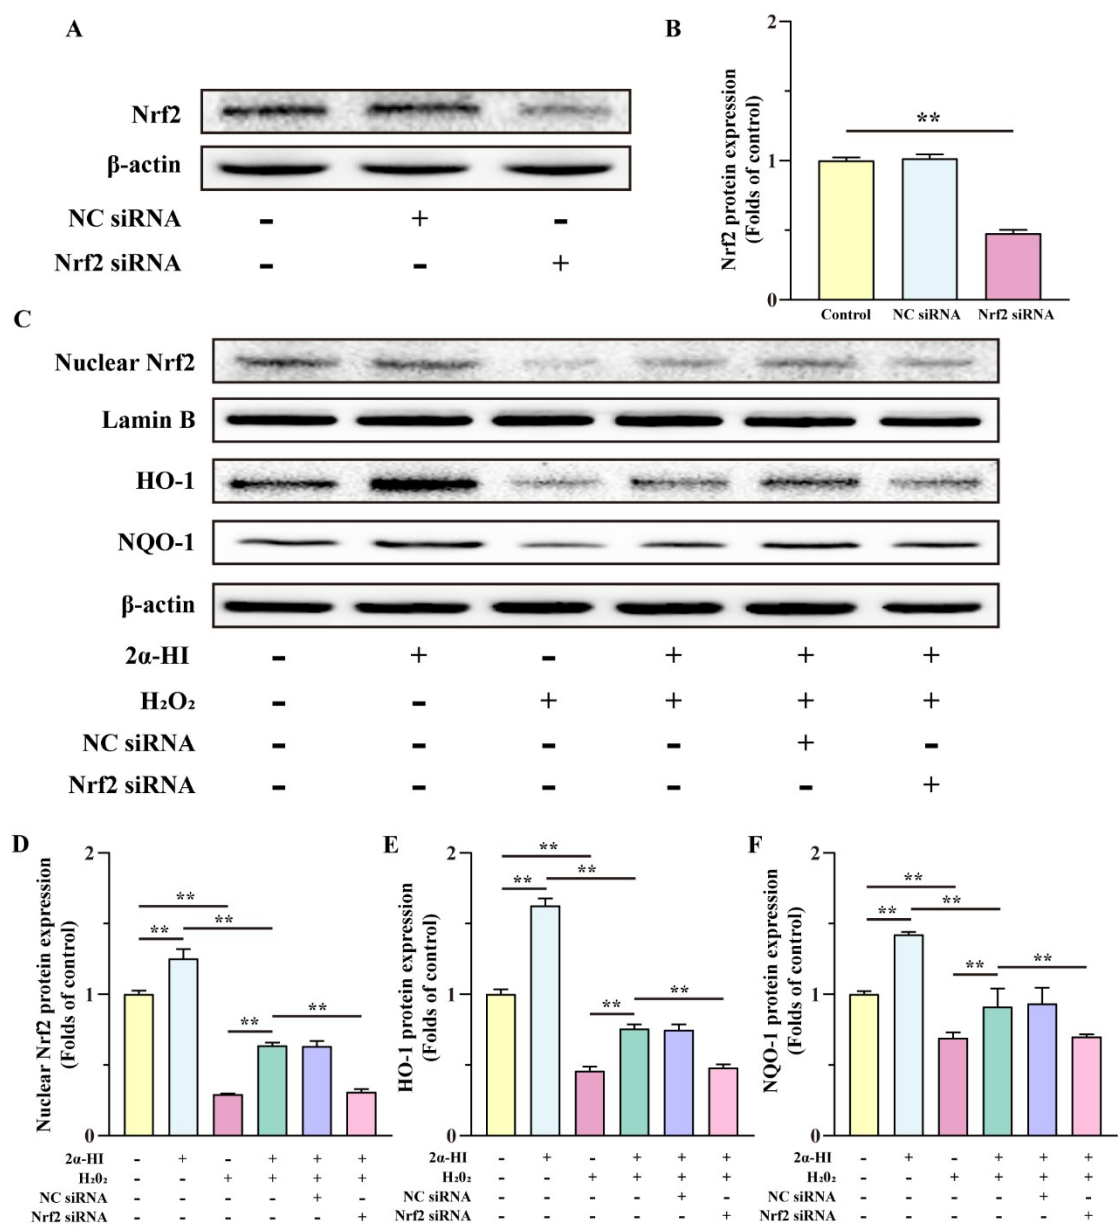

**Figure S5.** Nrf2 was involved in the antioxidant effect of 2α-HI (10 μM) in SH-SY5Y cells stimulated by H<sub>2</sub>O<sub>2</sub>. (A and B) Nrf2 siRNA or NC siRNA transfected cells. (C) Western blot analysis for Nrf2 in nuclear, HO-1 and NQO-1 in Nrf2 siRNA or NC siRNA transfected cells. (D-F) Density analysis.

Figure S6. <sup>1</sup>H NMR spectrum of 2 $\alpha$ -hydroxy-inotodiol.

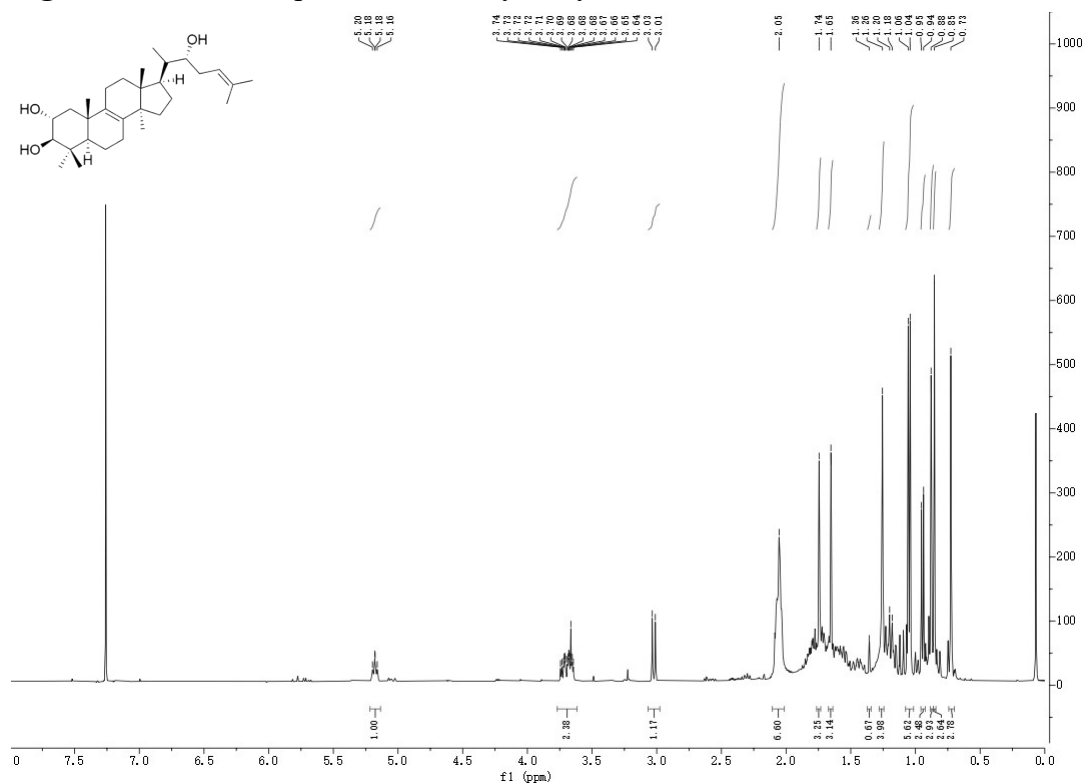

Figure S7. <sup>13</sup>C NMR spectrum of 2 $\alpha$ -hydroxy-inotodiol

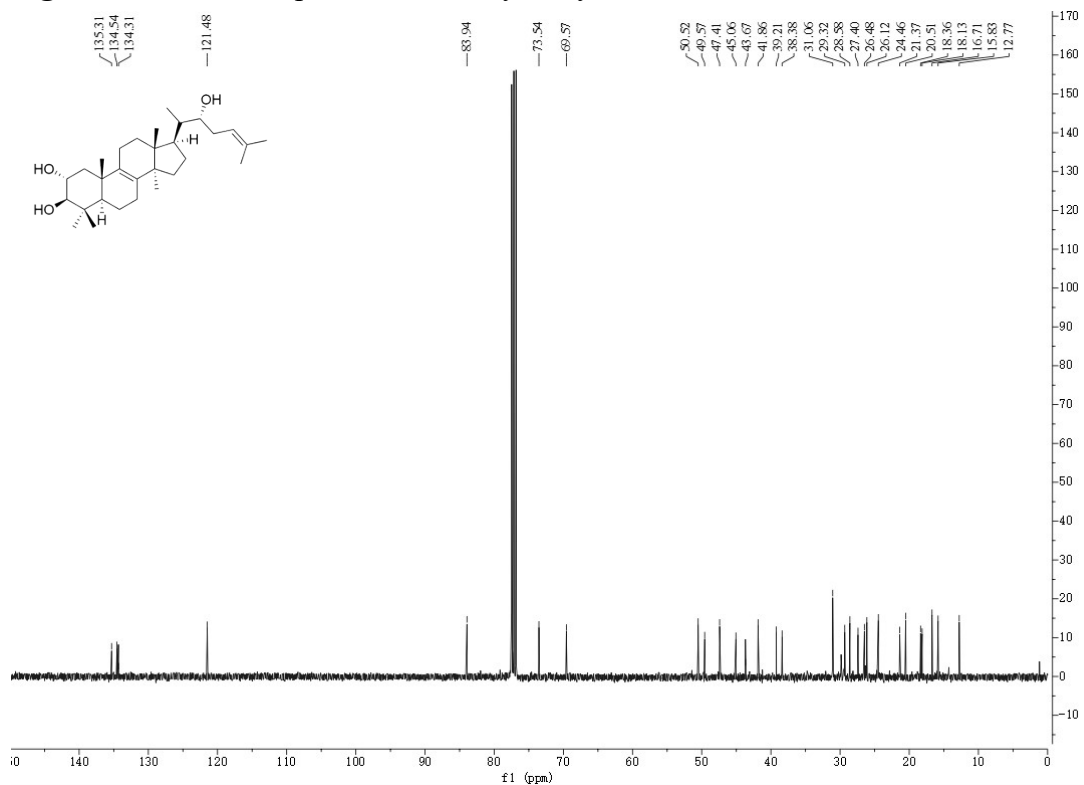

**Figure S8.** HSQC spectrum of 2 $\alpha$ -hydroxy-inotodiol

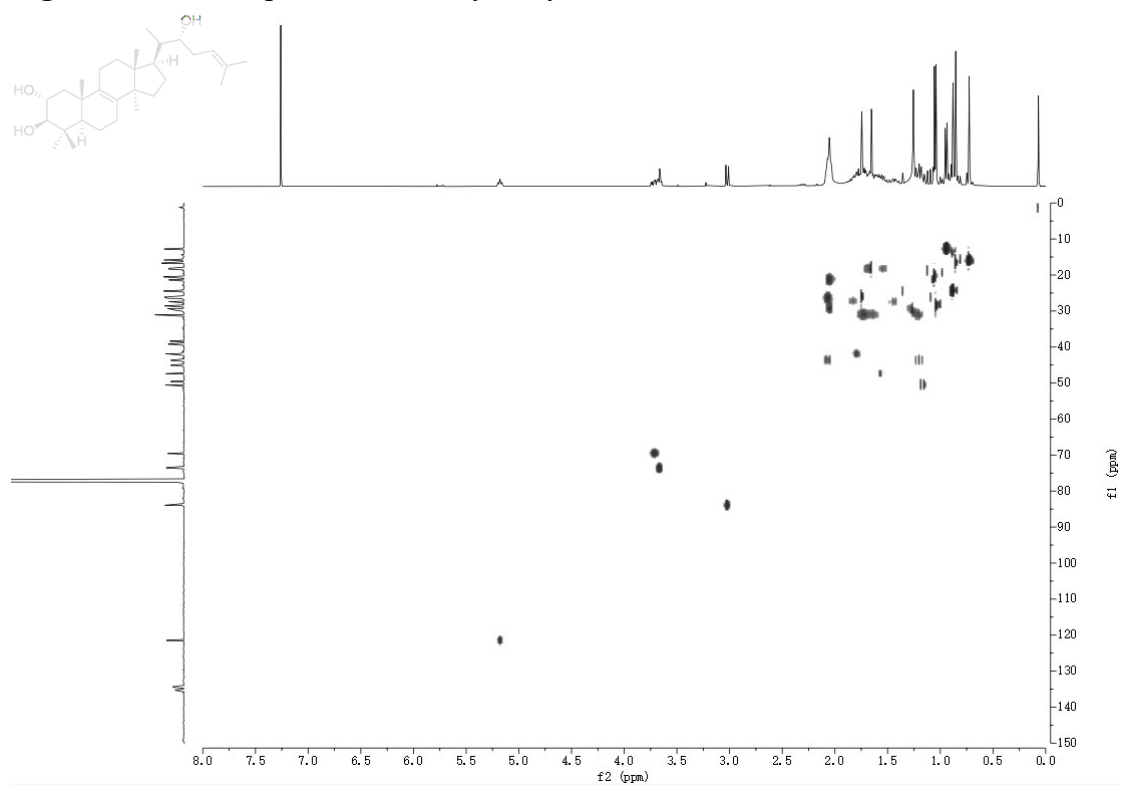

**Figure S9.**  $^1\text{H}$ - $^1\text{H}$  COSY spectrum of 2 $\alpha$ -hydroxy-inotodiol

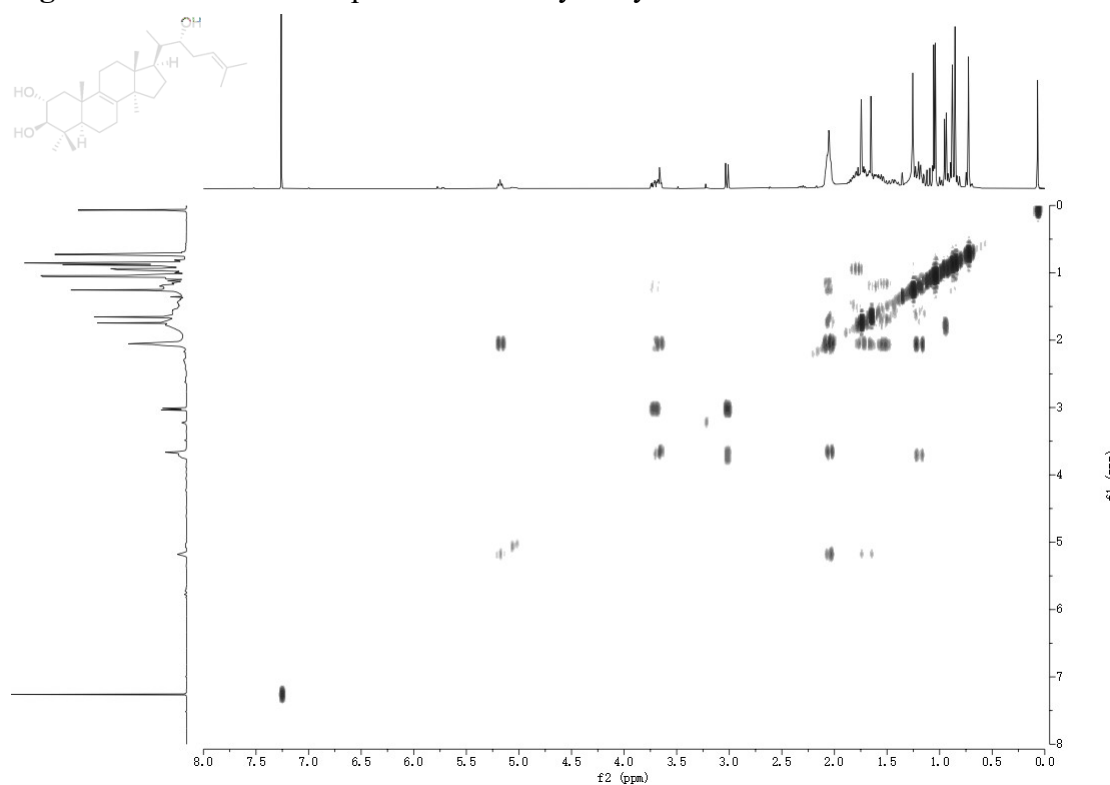

**Figure S10.** HMBC spectrum of 2 $\alpha$ -hydroxy-inotodiol

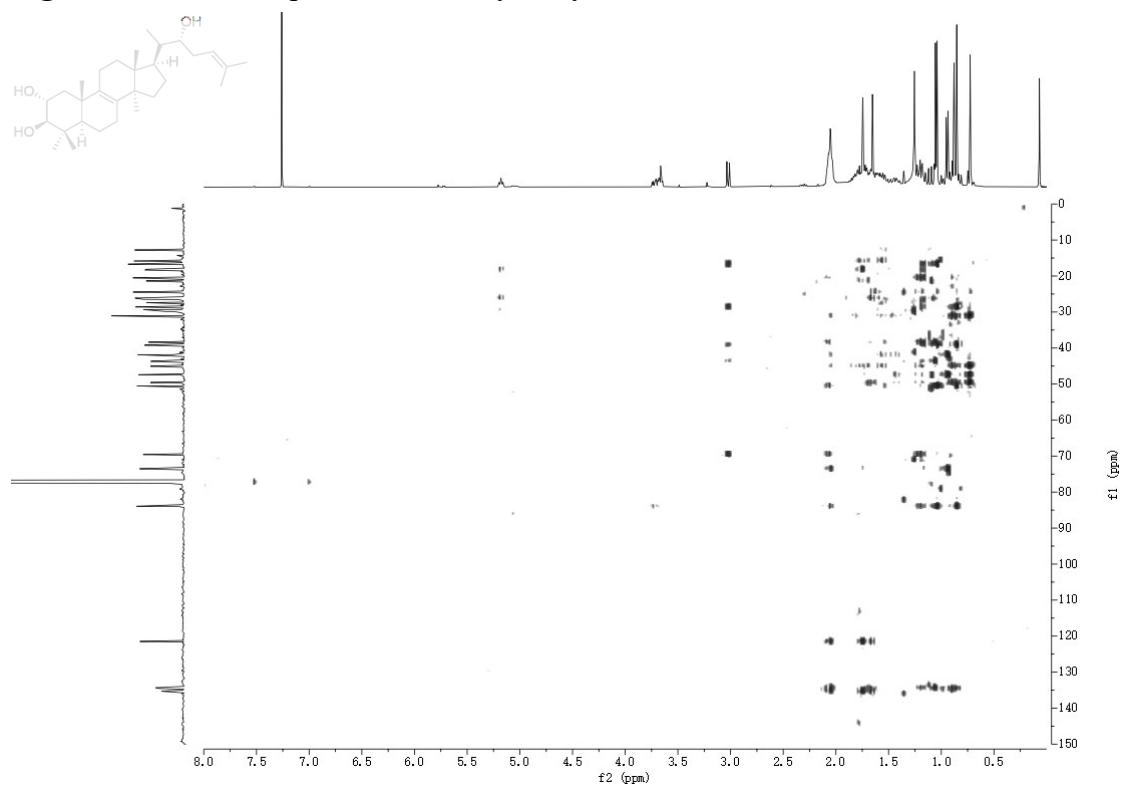

**Figure S11.** NOESY spectrum of 2 $\alpha$ -hydroxy-inotodiol

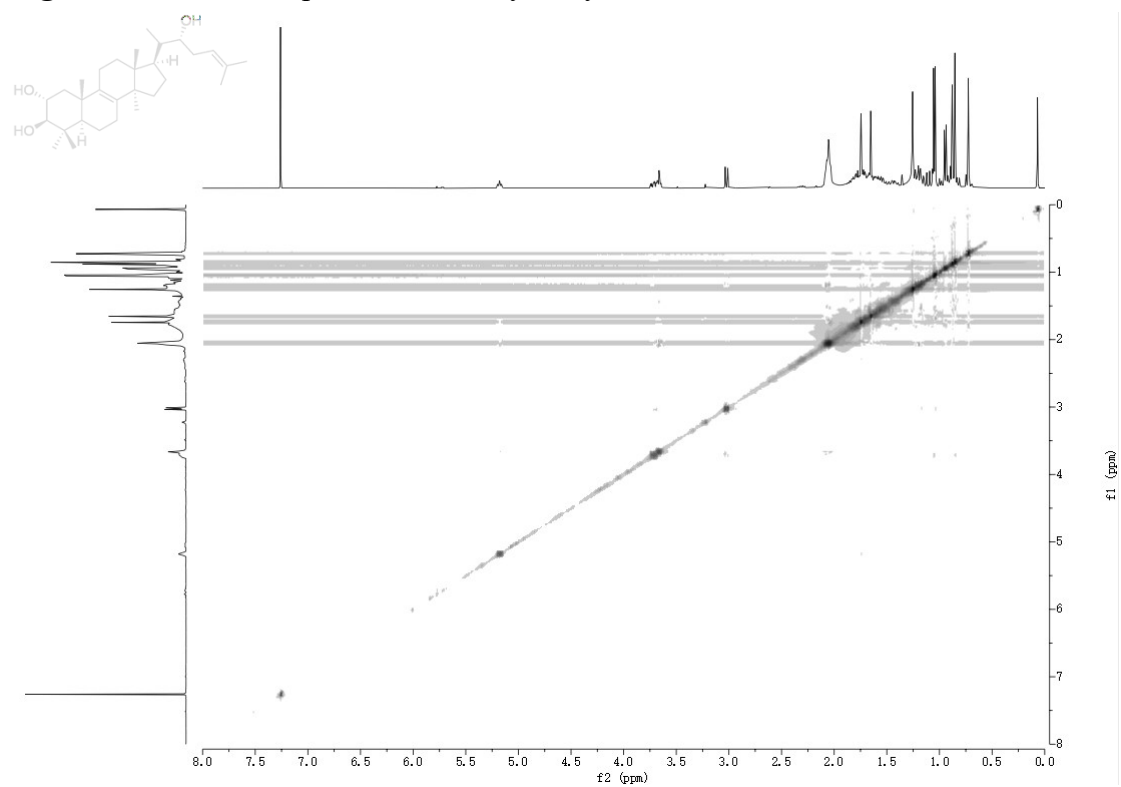



**Figure S12.** HRESIMS spectrum of 2 $\alpha$ -hydroxy-inotodiol

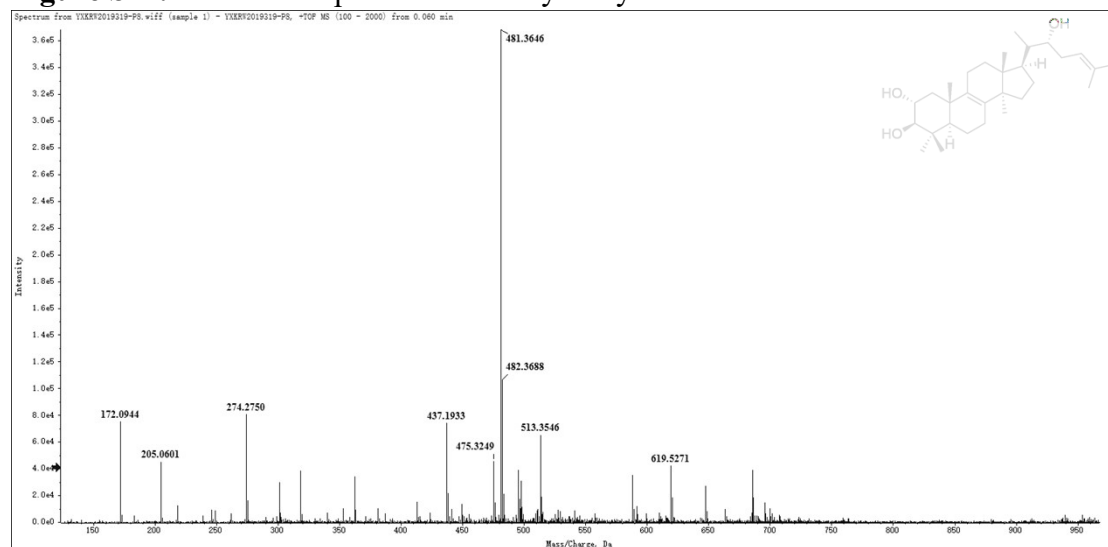

Supplement: d2fo02854a2.pdf [file d2fo02854a2.pdf]
